# Supplementary material for: The Effects of Berberine on the Gut Microbiota in Apc min/+ Mice Fed with a High Fat Diet
Source: MDPI journal article supplement (doi:10.3390/molecules23092298), 2018-09-08
Supplement: s1 [file s1]

Table S1. Significantly different genus between groups as revealed by taxon-based comparisons

| Taxon                                   | C5 %        | B5 %        | M5 %        | C5 vs M5<br>p value | B5 vs M5<br>p value |
|-----------------------------------------|-------------|-------------|-------------|---------------------|---------------------|
| S24-7_norank                            | 41.63       | 48.02       | 57.5        | 0.175               | 0.251               |
| Lachnospiraceae_uncultured              | 32.37       | 25.97       | 19.14       | 0.117               | 0.251               |
| Ruminococcaceae_uncultured              | 7.28        | 4.29        | 7.41        | 0.754               | 0.117               |
| <b>*Ruminococcaceae_incertae_sedis</b>  | <b>4.6</b>  | <b>3.72</b> | <b>2.1</b>  | <b>0.175</b>        | <b>0.016</b>        |
| Lachnospiraceae_unclassified            | 3.65        | 4.61        | 4.35        | 0.917               | 0.602               |
| <b>*Desulfovibrio</b>                   | <b>1.68</b> | <b>3.8</b>  | <b>0.77</b> | <b>0.602</b>        | <b>0.028</b>        |
| Roseburia                               | 1.47        | 1.38        | 0.89        | 0.917               | 0.116               |
| Ruminococcaceae_unclassified            | 1.54        | 1.47        | 2           | 0.917               | 0.917               |
| Anaerotruncus                           | 1.02        | 1.07        | 0.97        | 0.754               | 0.602               |
| <b>**Akkermansia</b>                    | <b>0.11</b> | <b>0.2</b>  | <b>1.12</b> | <b>0.028</b>        | <b>0.047</b>        |
| Oscillibacter                           | 1.12        | 0.82        | 0.87        | 0.602               | 0.834               |
| <b>*Alistipes</b>                       | <b>0.33</b> | <b>1.02</b> | <b>0.29</b> | <b>0.402</b>        | <b>0.047</b>        |
| <b>**Lachnospiraceae_incertae_sedis</b> | <b>0.5</b>  | <b>0.42</b> | <b>0</b>    | <b>0.005</b>        | <b>0.005</b>        |
| Ruminococcus                            | 0.92        | 0.39        | 0.32        | 0.175               | 0.53                |
| Odoribacter                             | 0.32        | 0.35        | 0.15        | 0.249               | 0.175               |
| <b>#Bacteroides</b>                     | <b>0.00</b> | <b>0.44</b> | <b>0.18</b> | <b>0.008</b>        | <b>0.173</b>        |
| <b>#Prevotellaceae_uncultured</b>       | <b>0.00</b> | <b>0.34</b> | <b>0.15</b> | <b>0.007</b>        | <b>0.834</b>        |
| Escherichia-Shigella                    | 0           | 0           | 0.08        | 0.419               | 0.572               |

# p<0.05: Control vs.Model; \*p<0.05: BBR vs.Model

Table S2. Significantly different phylum between groups as revealed by taxon-based comparisons

| Taxon                    | C5(%)       | B5(%)       | M5(%)       | C5 vs M5<br>p value | B5 vs M5<br>p value |
|--------------------------|-------------|-------------|-------------|---------------------|---------------------|
| Bacteroidetes            | 42.28       | 50.17       | 58.27       | 0.251               | 0.251               |
| Firmicutes               | 55.7        | 45.37       | 39.48       | 0.251               | 0.465               |
| <b>*Proteobacteria</b>   | <b>1.69</b> | <b>4.17</b> | <b>1.01</b> | <b>0.602</b>        | <b>0.028</b>        |
| <b>**Verrucomicrobia</b> | <b>0.11</b> | <b>0.2</b>  | <b>1.12</b> | <b>0.028</b>        | <b>0.047</b>        |

# p<0.05: Control vs.Model; \*p<0.05: BBR vs.Model

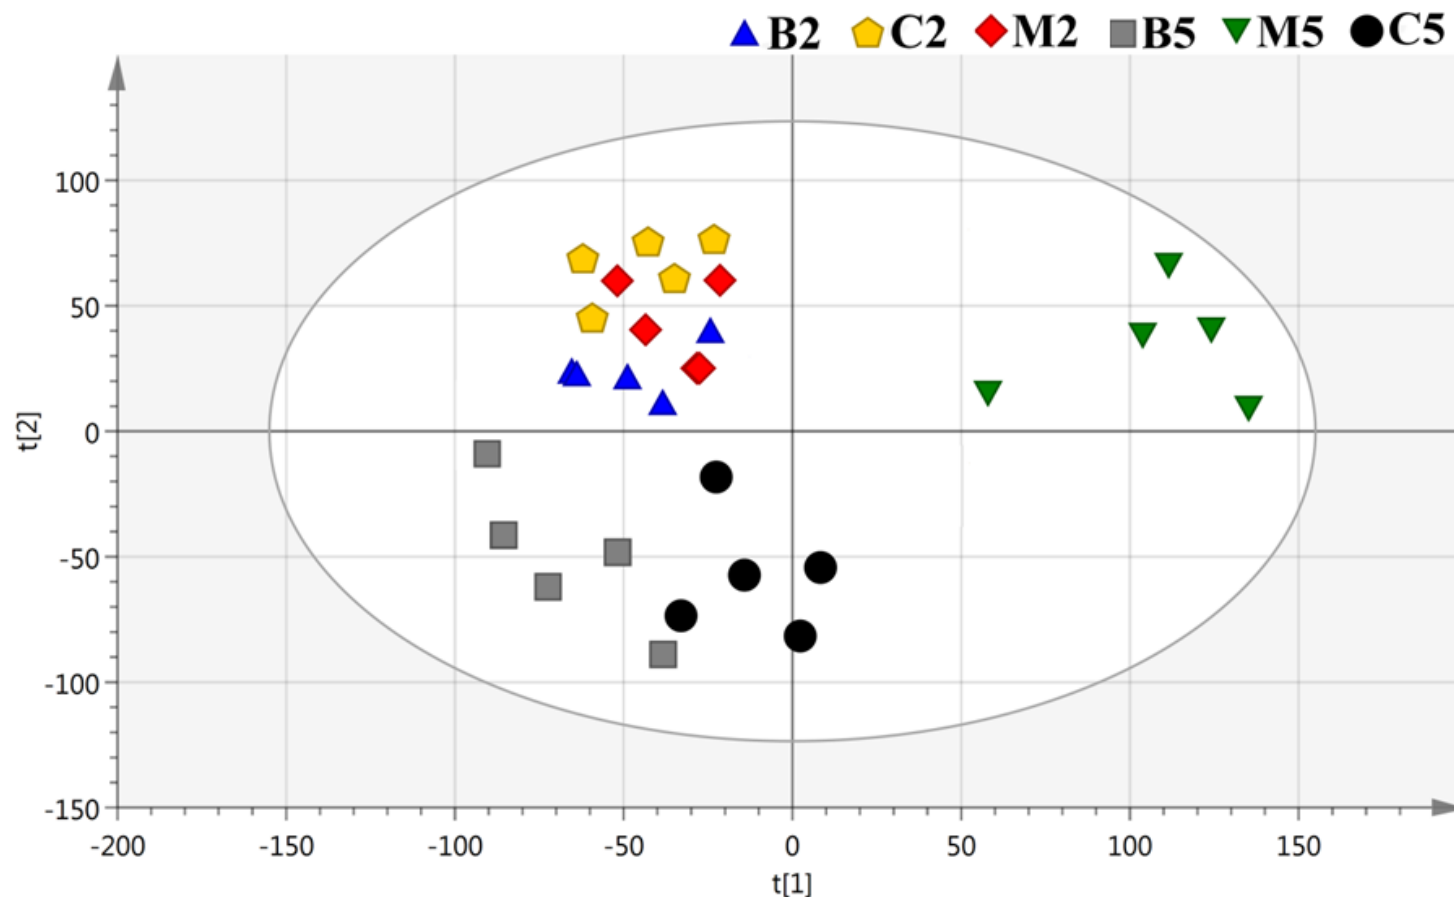

**Figure S1. PCA score plot for both 0-week collected and 12-week collected samples.**

C5: samples from wild type mice fed with standard diet after 12 weeks; M5: samples from  $Apc^{min/+}$  mice fed with high fat diet after 12 weeks; B5: samples from  $Apc^{min/+}$  mice fed with high fat diet and BBR supplemented after 12 weeks. C2: samples from wild type mice fed with standard diet after 0 weeks; M2: samples from  $Apc^{min/+}$  mice fed with high fat diet after 0 weeks; B2: samples from  $Apc^{min/+}$  mice fed with high fat diet and BBR supplemented after 0 weeks.

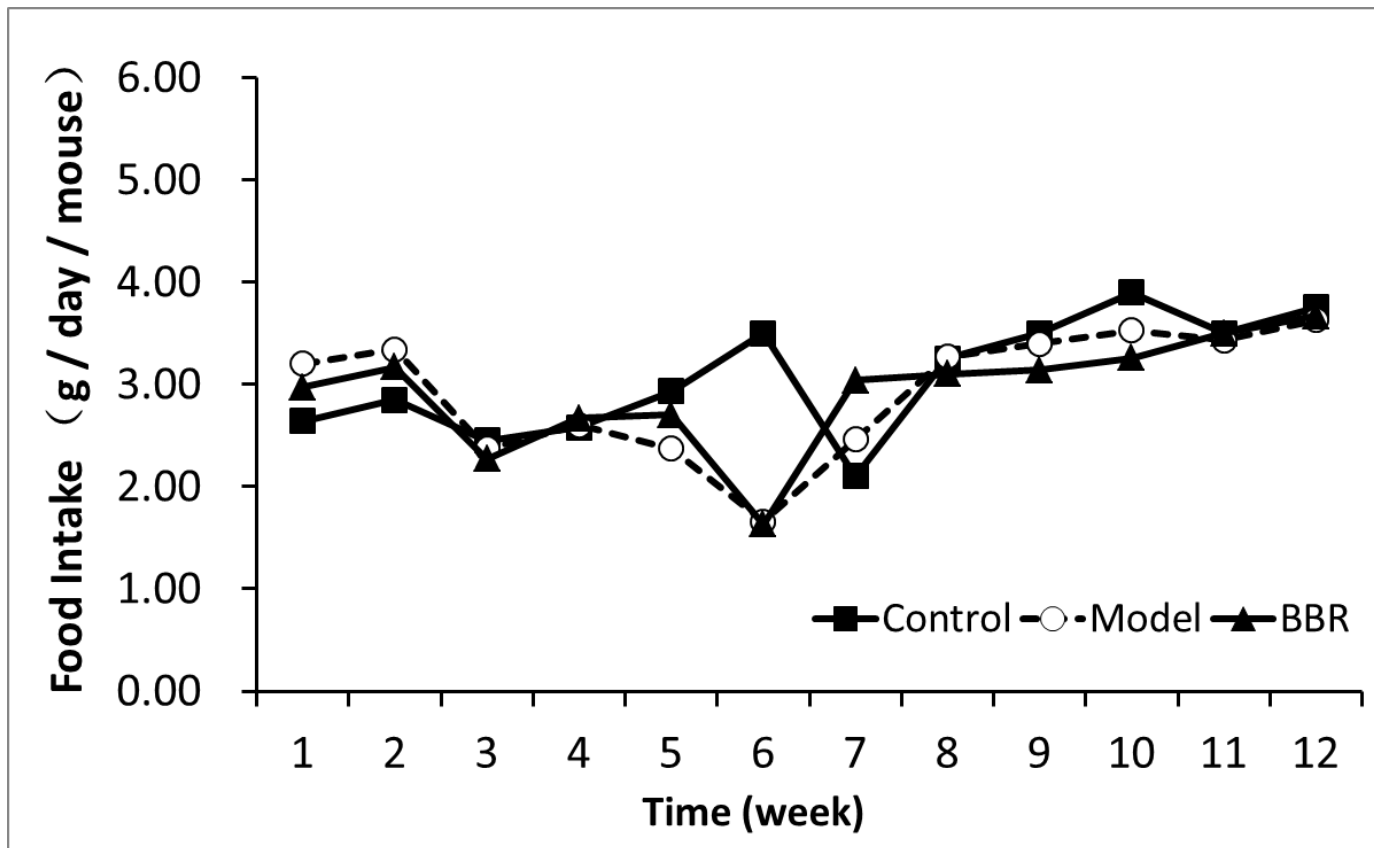

Figure S2. Food intake per mouse per day in the experimental period.

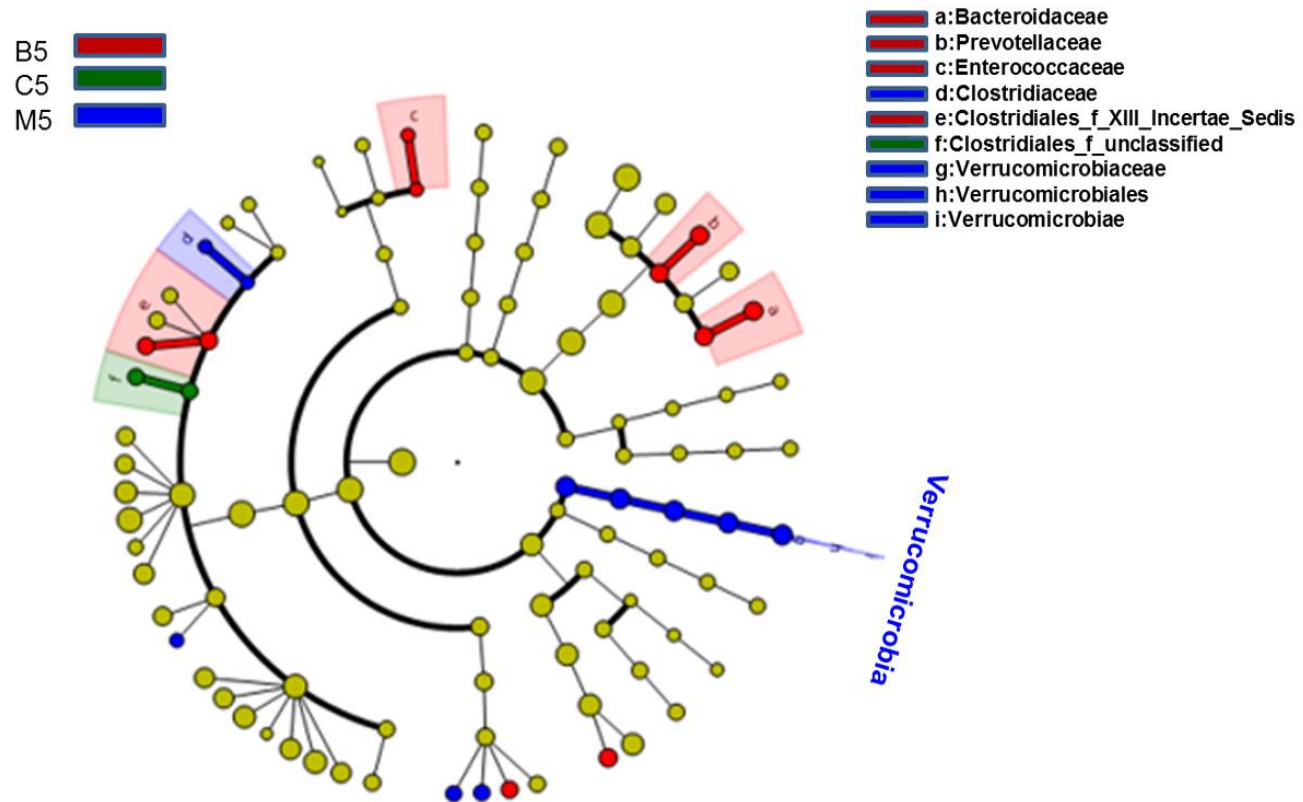

**Figure S3. Taxonomic representation of statistically and biologically consistent differences in three groups.**

Differences are represented by the color of the most abundant class (red indicating berberine group, green for control group, blue indicating model group and yellow for non-significant). The diameter of each circle is proportional to the taxon's abundance.

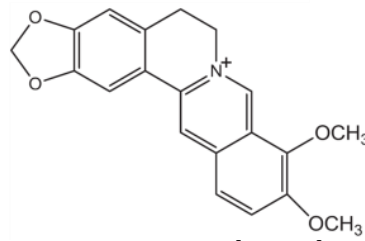

**Berberine (BBR)**

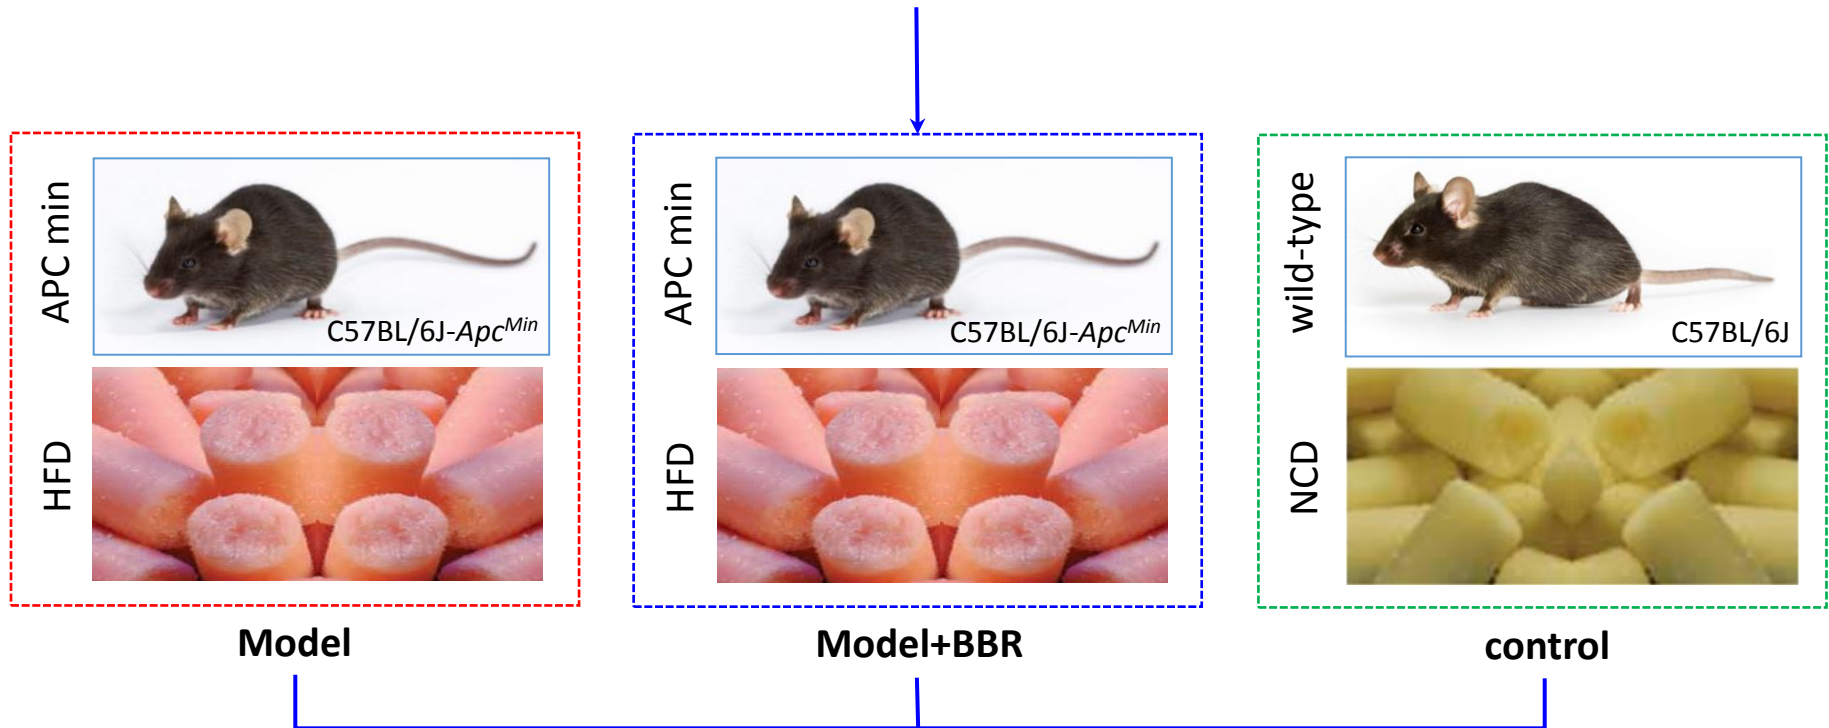

- **Gut microbiota structural changes**  
BBR supplementary restored the changes of microbiota structure in model group almost nearly to control group
- **Anti-tumor activity**

**Figure S4 Animal groups in this study**
